# Supplementary material
Source: PubMed Central journal article supplement (PMC4145027)
Supplement: NIHMS578826-supplement-Table_2.pdf [file NIHMS578826-supplement-Table_2.pdf]

**Table 2. Published studies examining correlation of preterm birth or related characteristics to optic nerve parameters in children and infants**

| Study                             | Hellstrom <sup>18</sup>         |            | Hellstrom <sup>19</sup> |               | Wikstrand <sup>21</sup>  |               | Wang, X <sup>20</sup>               | Samarawickrama <sup>6</sup>                | Akerblom <sup>4</sup>           |                                            | Wang, J <sup>5</sup>                     |            | Kandasamy <sup>11</sup>   | Tong (Current Study)                                                                                      |                           |    |
|-----------------------------------|---------------------------------|------------|-------------------------|---------------|--------------------------|---------------|-------------------------------------|--------------------------------------------|---------------------------------|--------------------------------------------|------------------------------------------|------------|---------------------------|-----------------------------------------------------------------------------------------------------------|---------------------------|----|
|                                   | Children                        |            | Children                |               | Children                 |               | Children                            | Children                                   | Children                        |                                            | Children                                 |            | Infants                   | Infants                                                                                                   |                           |    |
|                                   | Fundus photo                    |            | Fundus photo            |               | Fundus photo             |               | TDOCT                               | TDOCT                                      | TDOCT                           |                                            | SDOCT                                    |            | Retcam                    | Portable SDOCT                                                                                            |                           |    |
| Study Population                  | 39<br>preterm                   | 39<br>term | 50*<br>preterm          | 100**<br>term | 53<br>preterm            | 203**<br>term | 1765<br>preterm & term <sup>†</sup> | 2134<br>preterm & term <sup>†, ††</sup>    | 62<br>preterm                   | 54<br>term                                 | 25<br>preterm                            | 54<br>term | 35<br>term                | 44<br>preterm                                                                                             | 51<br>term                |    |
| Mean age (SD), yrs                | 4.8                             | 6.1        | --                      | --            | 5.4                      | --            | 6.7 (0.4)                           | 12.7                                       | 8.6 (1.7)                       | 10.1 (3.1)                                 | 10.6 (3.7)                               | 9.8 (3.2)  | 38.9 (1.4) <sup>†††</sup> | 39.0 (1.8) <sup>†††</sup>                                                                                 | 39.2 (1.1) <sup>†††</sup> |    |
| Age Range, yrs                    | 3.1-9.1                         | 2.9-9.1    | 5.1-9.3                 | 2.9-19.6      | 4.8-6.1                  | 3-19          | --                                  | --                                         | 5-16                            | 5-16                                       | --                                       | --         | --                        | 37-42 <sup>†††</sup>                                                                                      | 37-42 <sup>†††</sup>      |    |
| Correlation with Preterm Birth    | Disc Diam (mm)                  | --         | --                      | --            | --                       | --            | --                                  | --                                         | --                              | --                                         | --                                       | --         | --                        | V:1.326                                                                                                   | V:1.313<br>p= 0.633       |    |
|                                   | Disc Area (mm <sup>2</sup> )    | 2.80       | 2.86<br>p≥ 0.05         | 2.35          | 2.67<br>p< 0.001         | 2.2           | 2.4<br>p< 0.001                     | --                                         | --                              | --                                         | --                                       | --         | --                        | --                                                                                                        | --                        | -- |
|                                   | Cup Diam (mm)                   | --         | --                      | --            | --                       | --            | --                                  | --                                         | --                              | --                                         | --                                       | --         | --                        | V: 0.908                                                                                                  | V: 0.700<br>p<0.001       |    |
|                                   | Cup Area (mm <sup>2</sup> )     | 0.34       | 0.34<br>p≥ 0.05         | 0.36          | 0.41<br>p= 0.57          | 0.4           | 0.3<br>p= 0.0027                    | --                                         | --                              | --                                         | --                                       | --         | --                        | --                                                                                                        | --                        | -- |
|                                   | C:D                             | --         | --                      | --            | --                       | --            | --                                  | --                                         | --                              | --                                         | --                                       | --         | --                        | V: 0.68                                                                                                   | V: 0.53<br>p< 0.001       |    |
|                                   | Neuronal Rim (mm <sup>2</sup> ) | --         | --                      | 2.03          | 2.24<br>p< 0.001         | 1.7           | 2.1<br>p< 0.001                     | --                                         | --                              | --                                         | --                                       | --         | --                        | --                                                                                                        | --                        | -- |
|                                   | Cup Depth (mm)                  | --         | --                      | --            | --                       | --            | --                                  | --                                         | --                              | --                                         | --                                       | --         | --                        | 0.423                                                                                                     | 0.398<br>p= 0.544         |    |
|                                   | RNFL*** (µm)                    | --         | --                      | --            | --                       | --            | --                                  | No, values not reported                    | --                              | Yes, thinner<br>OD: p=0.016<br>OS: p=0.029 | Yes, thinner<br>98.5 vs 107,<br>p= 0.001 | --         | --                        | --                                                                                                        | --                        | -- |
| Correlation with Low Birth Weight | Disc Diam (mm)                  | --         | --                      | --            | --                       | --            | --                                  | V:1.848<br>p= 0.29<br>H:1.585<br>p= 0.29   | V: 1.878<br>H: 1.608<br>p= 0.29 | --                                         | --                                       | --         | --                        | No, p <sub>v</sub> = 0.218 <sup>††††</sup>                                                                | --                        |    |
|                                   | Disc Area (mm <sup>2</sup> )    | --         | --                      | --            | No, values not specified | --            | --                                  | 2.32<br>p=0.64                             | 2.34                            | --                                         | --                                       | 1.31       | 1.24<br>p= 0.3            | --                                                                                                        | --                        |    |
|                                   | Cup Diam (mm)                   | --         | --                      | --            | --                       | --            | --                                  | V:0.713<br>p= 0.11<br>H: 0.681<br>p= 0.139 | V: 0.653<br>H: 0.627            | --                                         | --                                       | --         | --                        | Slope <sub>v</sub> = -0.30, R <sup>2</sup> <sub>v</sub> = 0.07,<br>p <sub>v</sub> = 0.080 <sup>††††</sup> | --                        |    |
|                                   | Cup Area (mm <sup>2</sup> )     | --         | --                      | --            | r= -0.37,<br>p= 0.0083   | --            | --                                  | 0.45<br>p= 0.17                            | 0.41                            | --                                         | --                                       | --         | --                        | --                                                                                                        | --                        | -- |
|                                   | C:D                             | --         | --                      | --            | --                       | --            | --                                  | V:0.39<br>p= 0.03<br>H:0.43<br>p= 0.04     | V: 0.35<br>H:0.43               | --                                         | --                                       | --         | --                        | No, p <sub>v</sub> = 0.125 <sup>††††</sup>                                                                | --                        |    |

|                                           |                                 |    |    |                          |                             |                                                             |                                                            |    |    |                                                                 |
|-------------------------------------------|---------------------------------|----|----|--------------------------|-----------------------------|-------------------------------------------------------------|------------------------------------------------------------|----|----|-----------------------------------------------------------------|
|                                           | Neuronal Rim (mm <sup>2</sup> ) | -- | -- | <b>r= 0.35, p= 0.010</b> | --                          | --                                                          | --                                                         | -- | -- | --                                                              |
|                                           | Cup Depth (mm)                  | -- | -- | --                       | --                          | --                                                          | --                                                         | -- | -- | No, p <sub>v</sub> = 0.312 <sup>†††</sup>                       |
|                                           | RNFL <sup>***</sup> (μm)        | -- | -- | --                       | <b>100.4 104.1 p=0.006</b>  | --                                                          | <b>Yes<sup>†††</sup>, thinner OD: p= 0.050 OS: p= 0.28</b> | -- | -- | --                                                              |
| Correlation with Small Head Circumference | Disc Diam (mm)                  | -- | -- | --                       | --                          | --                                                          | --                                                         | -- | -- | <b>Yes, larger r<sub>v</sub>= -0.14.4, p<sub>v</sub>= 0.036</b> |
|                                           | Disc Area (mm <sup>2</sup> )    | -- | -- | No, values not reported  | --                          | <b>Q: smaller, 2.26 vs 2.32 vs 2.37 vs 2.40 p&lt; 0.001</b> | --                                                         | -- | -- | --                                                              |
|                                           | Cup Diam (mm)                   | -- | -- | --                       | --                          | --                                                          | --                                                         | -- | -- | No, r <sub>v</sub> = -21.0, p <sub>v</sub> = 0.106              |
|                                           | Cup Area (mm <sup>2</sup> )     | -- | -- | No, values not reported  | --                          | Q: no diff, 0.51 vs 0.48 vs 0.50 vs 0.47 p= 0.25            | --                                                         | -- | -- | --                                                              |
|                                           | C:D                             | -- | -- | --                       | --                          | <b>VQ: larger, 0.41 vs 0.39 vs 0.39 vs 0.37 p= 0.01</b>     | --                                                         | -- | -- | No, r <sub>v</sub> = -0.01, p <sub>v</sub> = 0.335              |
|                                           | Neuronal Rim (mm <sup>2</sup> ) | -- | -- | No, values not reported  | --                          | --                                                          | --                                                         | -- | -- | --                                                              |
|                                           | Cup Depth (mm)                  | -- | -- | --                       | --                          | --                                                          | --                                                         | -- | -- | <b>Yes, larger r<sub>v</sub>= -18.5, p<sub>v</sub>= 0.033</b>   |
|                                           | RNFL <sup>***</sup> (μm)        | -- | -- | --                       | <b>Yes, thinner p=0.001</b> | --                                                          | --                                                         | -- | -- | --                                                              |
| Lower VA                                  | RNFL <sup>***</sup> (μm)        | -- | -- | --                       | --                          | --                                                          | <b>Yes, thinner r= 0.42 p= 0.026</b>                       | -- | -- | --                                                              |

\*some preterm subjects were carried over from prior Hellstrom study<sup>18</sup>

\*\*term controls from previously published studies

\*\*\*average peripapillary retinal nerve fiber layer

number not specified in publication

†† comparison based on birth weight <2500 grams vs >2500 grams

††† weeks postmenstrual age

†††† analysis of preterm cohort only

TDOCT, time-domain optical coherence tomography; SDOCT, spectral-domain optical coherence tomography; Diam, diameter; yrs, years; SD, standard deviation; p, p-value; r, correlation coefficient

R<sup>2</sup>, coefficient of determination; V, vertical; H, horizontal; Q, quartiles; OD, right eye; OS, left eye; VA, visual acuity
