# Supplementary material
Source: PubMed Central journal article supplement (PMC4145027)
Supplement: NIHMS578826-supplement-Table_4.pdf [file NIHMS578826-supplement-Table_4.pdf]

---

**Table 4. Population and baseline characteristics of 26 preterm infants in a longitudinal analysis at 31-36 (mean 33.9) vs. 37-42 (mean 38.5) weeks PMA**

---

| <b>Parameter</b>                       | <b>Preterm Infants<br/>(n=26)</b> |
|----------------------------------------|-----------------------------------|
| PMA at Imaging, 31-36 weeks, mean (SD) | 33.9 (1.7)                        |
| PMA at Imaging, 37-42 weeks, mean (SD) | 38.5 (1.7)                        |
| Change in PMA (weeks), mean (SD)       | 4.7 (2.2)                         |
| Gestational Age (weeks), mean (SD)     | 25.9 (2.2)                        |
| Birth Weight (grams), mean (SD)        | 817 (242)                         |
| Gender, n (%)                          |                                   |
| Male                                   | 16 (61.5%)                        |
| Female                                 | 10 (38.5%)                        |
| Eye, n (%)                             |                                   |
| Right                                  | 12 (46.2%)                        |
| Left                                   | 14 (53.8%)                        |
| Stage 3 ROP/requiring laser, n (%)     | 10 (38.5%)                        |
| Race, n (%)                            |                                   |
| Black                                  | 15 (57.7%)                        |
| White                                  | 9 (34.6%)                         |
| Hispanic                               | 2 (7.7%)                          |

---

PMA, post-menstrual age; ROP, retinopathy of prematurity; SD, standard deviation

---
